# Supplementary material for: Post-Distillation By-Products of Aromatic Plants from Lamiaceae Family as Rich Sources of Antioxidants and Enzyme Inhibitors
Source: MDPI journal article supplement (doi:10.3390/antiox12010210), 2023-01-16
Supplement: s1 [file s1]

# SUPPLEMENTARY MATERIAL for

## Post-Distillation By-Products of Aromatic Plants from Lamiaceae Family as Rich Sources of Antioxidants and Enzyme Inhibitors

Simon Vlad Luca <sup>1,\*</sup>, Gokhan Zengin <sup>2,\*</sup>, Kouadio Ibrahime Sinan <sup>2</sup>, Krystyna Skalicka-Woźniak <sup>3</sup>  
and Adriana Trifan <sup>4</sup>

<sup>1</sup> Biothermodynamics, TUM School of Life Sciences, Technical University of Munich, 85354 Freising, Germany

<sup>2</sup> Physiology and Biochemistry Research Laboratory, Department of Biology, Science Faculty, Selcuk University, Konya 42130, Turkey

<sup>3</sup> Department of Natural Products Chemistry, Medical University of Lublin, 20-093 Lublin, Poland

<sup>4</sup> Department of Pharmacognosy and Phytotherapy, Faculty of Pharmacy, "Grigore T. Popa" University of Medicine and Pharmacy Iasi, 700115 Iasi, Romania

\* Correspondence: vlad.luca@tum.de (S.V.L.); gokhanzengin@selcuk.edu.tr (G.Z.)

---

**Table S1.** Correlation value between chemical compounds of extracts and antioxidant abilities ( $R^2$ )

| Compounds                           | DPPH  | ABTS  | CUPRAC | FRAP  | MCA   | PBD   |
|-------------------------------------|-------|-------|--------|-------|-------|-------|
| Quinic acid                         | -0,22 | -0,18 | -0,22  | -0,18 | 0,32  | -0,31 |
| Danshensu                           | 0,14  | 0,22  | 0,11   | 0,15  | 0,2   | 0,04  |
| Hydroxybenzoic acid-O-hexoside      | -0,42 | -0,44 | -0,4   | -0,37 | 0,1   | -0,42 |
| Hydroxybenzoic acid                 | 0,29  | 0,25  | 0,29   | 0,3   | 0,25  | 0,31  |
| Caftaric acid                       | 0,89  | 0,87  | 0,89   | 0,88  | 0,26  | 0,87  |
| Caffeic acid-O-hexoside             | -0,43 | -0,45 | -0,42  | -0,38 | 0,1   | -0,43 |
| Tuberonic acid-O-hexoside           | -0,47 | -0,44 | -0,49  | -0,45 | -0,01 | -0,54 |
| Roseoside                           | 0,9   | 0,9   | 0,9    | 0,88  | 0,24  | 0,88  |
| Caffeic acid                        | 0,11  | -0,03 | 0,13   | 0,11  | 0,01  | 0,2   |
| Thymoquinol-O-hexoside              | -0,28 | -0,26 | -0,31  | -0,25 | 0,17  | -0,35 |
| Tuberonic acid                      | -0,9  | -0,89 | -0,9   | -0,89 | -0,26 | -0,87 |
| Quercetin-C-deoxyhesoide-C-hexoside | -0,47 | -0,44 | -0,5   | -0,46 | -0,02 | -0,55 |
| Fertaric acid                       | 0,9   | 0,9   | 0,89   | 0,88  | 0,25  | 0,87  |
| Luteolin-C-deoxyhexoside-C-hexoside | -0,82 | -0,76 | -0,83  | -0,81 | -0,17 | -0,84 |
| Aromadendrin-O-hexoside             | -0,34 | -0,32 | -0,36  | -0,39 | -0,29 | -0,28 |
| p-Menth-1-ene-3,4-diol-O-hexoside   | -0,87 | -0,86 | -0,87  | -0,85 | -0,2  | -0,85 |
| Luteolin-di-O-glucuronide           | -0,47 | -0,44 | -0,5   | -0,46 | -0,02 | -0,55 |
| Quercetin-O-hexoside I              | -0,42 | -0,45 | -0,4   | -0,43 | -0,25 | -0,33 |
| Quercetin-O-pentoside-O-hexoside    | 0,64  | 0,49  | 0,63   | 0,64  | 0,29  | 0,64  |
| Taxifolin                           | -0,66 | -0,61 | -0,69  | -0,67 | -0,19 | -0,69 |
| Salvianolic acid H                  | 0,4   | 0,41  | 0,37   | 0,4   | 0,24  | 0,3   |
| Quercetin-O-hexoside II             | 0,11  | -0,03 | 0,13   | 0,1   | 0     | 0,2   |
| Galocatechin                        | -0,89 | -0,88 | -0,88  | -0,87 | -0,24 | -0,86 |
| Luteolin-O-deoxyhexoside-O-hexoside | 0,64  | 0,49  | 0,63   | 0,63  | 0,3   | 0,64  |
| Salvianolic acid D                  | 0,07  | -0,02 | 0,04   | 0,08  | 0,24  | 0     |
| Rosmarinic acid                     | -0,45 | -0,34 | -0,47  | -0,44 | -0,17 | -0,51 |
| Salvianolic acid B                  | -0,47 | -0,44 | -0,49  | -0,45 | -0,01 | -0,54 |
| Salvianolic acid A                  | -0,47 | -0,44 | -0,49  | -0,45 | -0,01 | -0,54 |
| Cichoric acid                       | 0,9   | 0,88  | 0,9    | 0,88  | 0,25  | 0,88  |
| Cymenol-O-hexoside                  | -0,43 | -0,45 | -0,41  | -0,44 | -0,25 | -0,34 |
| Salvianolic acid I                  | -0,47 | -0,44 | -0,49  | -0,45 | -0,01 | -0,54 |
| Eriodictyol                         | -0,42 | -0,45 | -0,4   | -0,43 | -0,26 | -0,33 |
| Salvianolic acid E                  | -0,47 | -0,44 | -0,49  | -0,45 | -0,01 | -0,54 |
| Salvianolic acid A isomer           | 0,9   | 0,89  | 0,9    | 0,89  | 0,23  | 0,88  |
| Luteolin                            | 0,07  | -0,07 | 0,09   | 0,06  | -0,04 | 0,16  |
| Trihydroxyoctadecadienoic acid I    | -0,19 | -0,13 | -0,17  | -0,2  | -0,16 | -0,12 |
| Apigenin                            | -0,48 | -0,44 | -0,5   | -0,46 | -0,02 | -0,55 |
| Cirsimaritin                        | 0,43  | 0,39  | 0,45   | 0,41  | -0,07 | 0,52  |
| Trihydroxyoctadecenoic acid I       | -0,43 | -0,45 | -0,41  | -0,43 | -0,25 | -0,33 |

|                                                               |       |       |       |       |       |       |
|---------------------------------------------------------------|-------|-------|-------|-------|-------|-------|
| Ladanein                                                      | 0,66  | 0,5   | 0,65  | 0,65  | 0,24  | 0,66  |
| Kaempferol                                                    | -0,47 | -0,44 | -0,49 | -0,45 | -0,02 | -0,54 |
| Carvone                                                       | -0,48 | -0,45 | -0,5  | -0,46 | -0,02 | -0,55 |
| Trihydroxyoctadecadienoic acid II                             | -0,43 | -0,45 | -0,4  | -0,43 | -0,26 | -0,33 |
| Pebrellin                                                     | -0,42 | -0,45 | -0,4  | -0,43 | -0,27 | -0,33 |
| Cirsilineol                                                   | 0,43  | 0,39  | 0,45  | 0,41  | -0,02 | 0,51  |
| Hydroperoxyoctadecadienoic acid                               | -0,04 | -0,14 | -0,02 | -0,04 | -0,43 | 0,08  |
| Carnosol                                                      | -0,81 | -0,81 | -0,79 | -0,81 | -0,58 | -0,72 |
| Dehydrocarnosol                                               | -0,9  | -0,89 | -0,89 | -0,89 | -0,31 | -0,86 |
| Hydroxyoctadecatrienoic acid                                  | 0,12  | 0,12  | 0,16  | 0,11  | -0,66 | 0,23  |
| 4'-Hydroxy-5,5'-diisopropyl-2,2'-dimethyl-3,4-biphenylquinone | -0,61 | -0,62 | -0,59 | -0,61 | -0,71 | -0,52 |
| Hydroxyoctadecadienoic acid                                   | 0,12  | 0,15  | 0,14  | 0,11  | -0,93 | 0,22  |
| 3,4,4'-Trihydroxy-5,5'-diisopropyl-2,2'-dimethylbiphenyl      | -0,53 | -0,56 | -0,52 | -0,53 | -0,66 | -0,43 |

**Table S2.** Correlation value between chemical compounds of essential oils and antioxidant abilities (R<sup>2</sup>)

| Compounds                          | DPPH  | ABTS  | CUPRAC | FRAP  | MCA   | PBD   |
|------------------------------------|-------|-------|--------|-------|-------|-------|
| Methyl 2-methylbutanoate           | 0,92  | -0,3  | -0,99  | 1     | 1     | 0,99  |
| $\alpha$ -Phellandrene             | 0,72  | 0,06  | -0,98  | 0,92  | 0,93  | 0,98  |
| $\alpha$ -Pinene                   | 0,89  | -0,23 | -1     | 1     | 1     | 1     |
| Camphene                           | 0,89  | -0,21 | -1     | 0,99  | 1     | 1     |
| Sabinene                           | -0,12 | -0,68 | 0,62   | -0,47 | -0,5  | -0,63 |
| $\beta$ -Pinene                    | 0,96  | -0,4  | -0,97  | 1     | 0,99  | 0,96  |
| 3-Octanone                         | -0,12 | 0,84  | -0,41  | 0,24  | 0,28  | 0,43  |
| $\beta$ -Myrcene*                  | 0,72  | 0,07  | -0,97  | 0,92  | 0,93  | 0,98  |
| 3-Octanol                          | 0,77  | -0,01 | -0,99  | 0,95  | 0,96  | 0,99  |
| 3-Thujene                          | 0,43  | 0,41  | -0,84  | 0,72  | 0,75  | 0,85  |
| 3-Carene                           | 0,92  | -0,3  | -0,99  | 1     | 1     | 0,99  |
| $\alpha$ -Terpinene                | 0,53  | 0,31  | -0,89  | 0,8   | 0,82  | 0,9   |
| <i>p</i> -Cymene                   | 0,79  | -0,05 | -0,99  | 0,96  | 0,97  | 1     |
| Limonene*                          | 0,86  | -0,17 | -1     | 0,99  | 0,99  | 1     |
| Eucalyptol                         | 0,04  | -0,79 | 0,48   | -0,31 | -0,35 | -0,49 |
| <i>trans</i> - $\beta$ -Ocimene    | -0,12 | -0,68 | 0,62   | -0,47 | -0,5  | -0,63 |
| <i>cis</i> - $\alpha$ -Ocimene     | -0,12 | -0,68 | 0,62   | -0,47 | -0,5  | -0,63 |
| $\gamma$ -Terpinene                | 0,54  | 0,3   | -0,9   | 0,8   | 0,82  | 0,9   |
| 4-Pentenyl butyrate                | 0,92  | -0,3  | -0,99  | 1     | 1     | 0,99  |
| <i>cis</i> - $\alpha$ -Terpineol   | 0,99  | -0,72 | -0,8   | 0,89  | 0,88  | 0,79  |
| $\alpha$ -Terpinolene              | 0,5   | -0,98 | 0,02   | 0,16  | 0,12  | -0,04 |
| <i>p</i> -Cymenene                 | 0,92  | -0,3  | -0,99  | 1     | 1     | 0,99  |
| Linalool*                          | 0,03  | -0,78 | 0,5    | -0,33 | -0,37 | -0,51 |
| <i>trans</i> -5-Caranol            | -0,8  | 0,98  | 0,37   | -0,53 | -0,5  | -0,35 |
| Fenchyl alcohol                    | -0,12 | -0,68 | 0,62   | -0,47 | -0,5  | -0,63 |
| <i>cis-p</i> -Menth-2-en-1-ol      | 0,69  | 0,11  | -0,97  | 0,9   | 0,92  | 0,97  |
| <i>trans-p</i> -Menth-2-en-1-ol    | 0,69  | 0,11  | -0,97  | 0,9   | 0,92  | 0,97  |
| Camphor                            | 0,65  | -1    | -0,16  | 0,34  | 0,3   | 0,14  |
| <i>cis</i> -Terpin hydrate         | -0,12 | -0,68 | 0,62   | -0,47 | -0,5  | -0,63 |
| Borneol                            | 0,69  | 0,11  | -0,96  | 0,9   | 0,92  | 0,97  |
| Terpinen-4-ol                      | 0,58  | 0,25  | -0,92  | 0,83  | 0,85  | 0,93  |
| <i>p</i> -Cymen-8-ol               | 0,85  | -0,15 | -1     | 0,98  | 0,99  | 1     |
| Estragole                          | -0,12 | -0,68 | 0,62   | -0,47 | -0,5  | -0,63 |
| <i>trans</i> - $\alpha$ -Terpineol | 0,57  | 0,27  | -0,91  | 0,82  | 0,84  | 0,92  |
| Dihydrocarvone                     | -0,8  | 0,98  | 0,37   | -0,53 | -0,5  | -0,35 |
| Octyl acetate                      | -0,12 | -0,68 | 0,62   | -0,47 | -0,5  | -0,63 |
| <i>cis</i> -Geraniol               | -0,12 | -0,68 | 0,62   | -0,47 | -0,5  | -0,63 |

|                                     |       |       |       |       |       |       |
|-------------------------------------|-------|-------|-------|-------|-------|-------|
| Thymol methyl ether                 | 0,92  | -0,3  | -0,99 | 1     | 1     | 0,99  |
| Isothymol methyl ether              | 0,54  | 0,3   | -0,9  | 0,8   | 0,82  | 0,9   |
| <i>d</i> -Darvone                   | -0,69 | -0,11 | 0,97  | -0,9  | -0,92 | -0,97 |
| <i>trans</i> -Geraniol              | 0,42  | -0,97 | 0,11  | 0,07  | 0,04  | -0,12 |
| <i>m</i> -Cymene                    | 0,92  | -0,3  | -0,99 | 1     | 1     | 0,99  |
| Thymol isomer                       | 0,87  | -0,18 | -1    | 0,99  | 0,99  | 1     |
| Bornyl acetate                      | -0,12 | -0,68 | 0,62  | -0,47 | -0,5  | -0,63 |
| Thymol                              | 0,81  | -0,08 | -1    | 0,97  | 0,97  | 1     |
| Carvacrol                           | -0,76 | 0,99  | 0,31  | -0,48 | -0,45 | -0,3  |
| ( <i>Z</i> )-Methyl cinnamate       | -0,12 | -0,68 | 0,62  | -0,47 | -0,5  | -0,63 |
| Isoeugenol                          | -0,8  | 0,98  | 0,37  | -0,53 | -0,5  | -0,35 |
| 2-Hydroxycineole acetate            | -0,12 | -0,68 | 0,62  | -0,47 | -0,5  | -0,63 |
| Eugenol                             | -0,1  | -0,7  | 0,6   | -0,45 | -0,48 | -0,61 |
| Isobornyl propionate                | 0,92  | -0,3  | -0,99 | 1     | 1     | 0,99  |
| Copaene                             | 0,4   | -0,96 | 0,14  | 0,05  | 0,01  | -0,15 |
| $\alpha$ -Farnesene                 | 0,92  | -0,3  | -0,99 | 1     | 1     | 0,99  |
| ( <i>E</i> )-Methyl cinnamate       | -0,12 | -0,68 | 0,62  | -0,47 | -0,5  | -0,63 |
| $\beta$ -Elemene                    | -0,12 | -0,68 | 0,62  | -0,47 | -0,5  | -0,63 |
| Methyl eugenol                      | -0,12 | -0,68 | 0,62  | -0,47 | -0,5  | -0,63 |
| ( <i>E</i> )- $\alpha$ -Bergamotene | -0,12 | -0,68 | 0,62  | -0,47 | -0,5  | -0,63 |
| Caryophyllene*                      | 0,57  | 0,26  | -0,91 | 0,83  | 0,85  | 0,92  |
| ( <i>Z</i> )- $\alpha$ -Bergamotene | -0,12 | -0,68 | 0,62  | -0,47 | -0,5  | -0,63 |
| 4- <i>t</i> -Butyl-pyrocatechol     | 0,82  | -0,1  | -1    | 0,97  | 0,98  | 1     |
| $\gamma$ -Elemene                   | -0,89 | 0,22  | 1     | -0,99 | -1    | -1    |
| $\beta$ -Farnesene                  | -0,12 | -0,68 | 0,62  | -0,47 | -0,5  | -0,63 |
| Cedrene                             | -0,12 | -0,68 | 0,62  | -0,47 | -0,5  | -0,63 |
| Humulene*                           | -0,28 | -0,55 | 0,74  | -0,6  | -0,63 | -0,75 |
| Nerol acetate                       | 0,92  | -0,3  | -0,99 | 1     | 1     | 0,99  |
| $\beta$ -Cubenene                   | -0,12 | -0,68 | 0,62  | -0,47 | -0,5  | -0,63 |
| $\alpha$ -Himalachene               | -0,12 | -0,68 | 0,62  | -0,47 | -0,5  | -0,63 |
| $\alpha$ -Huaiene                   | 0,74  | -0,99 | -0,29 | 0,46  | 0,43  | 0,28  |
| Germacrene D                        | -0,12 | -0,68 | 0,62  | -0,47 | -0,5  | -0,63 |
| $\beta$ -Selinene                   | 0,08  | -0,81 | 0,45  | -0,28 | -0,32 | -0,47 |
| $\alpha$ -Selinene                  | 0,08  | -0,81 | 0,45  | -0,28 | -0,32 | -0,47 |
| $\beta$ -Bisabolene                 | -1    | 0,57  | 0,9   | -0,96 | -0,95 | -0,89 |
| $\gamma$ -Cadinene                  | -0,06 | -0,73 | 0,57  | -0,41 | -0,44 | -0,58 |
| $\beta$ -Cadinene                   | 0,71  | 0,08  | -0,97 | 0,91  | 0,93  | 0,98  |
| $\delta$ -Cadinene                  | 0,02  | -0,78 | 0,5   | -0,34 | -0,37 | -0,52 |
| $\alpha$ -Bisabolene                | -0,12 | -0,68 | 0,62  | -0,47 | -0,5  | -0,63 |

|                                                          |       |       |       |       |       |       |
|----------------------------------------------------------|-------|-------|-------|-------|-------|-------|
| ( <i>E</i> )-Farnesene epoxide                           | -0,12 | -0,68 | 0,62  | -0,47 | -0,5  | -0,63 |
| Nerolidol                                                | -0,12 | -0,68 | 0,62  | -0,47 | -0,5  | -0,63 |
| Globulol                                                 | -0,12 | -0,68 | 0,62  | -0,47 | -0,5  | -0,63 |
| Spathulenol                                              | -0,16 | -0,65 | 0,65  | -0,5  | -0,53 | -0,66 |
| $\beta$ -Caryophyllene oxide*                            | 0,23  | 0,59  | -0,7  | 0,56  | 0,59  | 0,71  |
| Aromadendrene oxide                                      | -0,12 | -0,68 | 0,62  | -0,47 | -0,5  | -0,63 |
| <i>cis</i> -( <i>Z</i> )- $\alpha$ -Bisabolene epoxide   | -0,12 | -0,68 | 0,62  | -0,47 | -0,5  | -0,63 |
| <i>trans</i> -( <i>E</i> )- $\alpha$ -Bisabolene epoxide | -0,8  | 0,98  | 0,37  | -0,53 | -0,5  | -0,35 |
| Cubenol                                                  | -0,01 | -0,76 | 0,53  | -0,36 | -0,4  | -0,54 |
| $\gamma$ -Eudesmol                                       | 0,92  | -0,3  | -0,99 | 1     | 1     | 0,99  |
| <i>trans</i> -( <i>Z</i> )- $\alpha$ -Bisabolene epoxide | -0,12 | -0,68 | 0,62  | -0,47 | -0,5  | -0,63 |
| $\alpha$ -Cadinol                                        | -0,08 | -0,71 | 0,58  | -0,43 | -0,46 | -0,6  |
| $\beta$ -Eudesmol                                        | -0,03 | -0,75 | 0,54  | -0,38 | -0,42 | -0,56 |
| <i>allo</i> -Aromadendrene epoxide                       | 0,34  | -0,94 | 0,2   | -0,02 | -0,05 | -0,21 |
| $\alpha$ -Bisabolol*                                     | -0,12 | -0,68 | 0,62  | -0,47 | -0,5  | -0,63 |
| Ledene alcohol                                           | -0,12 | -0,68 | 0,62  | -0,47 | -0,5  | -0,63 |
| Ledene oxide                                             | -0,12 | -0,68 | 0,62  | -0,47 | -0,5  | -0,63 |
| Isoaromandendrene epoxide                                | -0,12 | -0,68 | 0,62  | -0,47 | -0,5  | -0,63 |

**Table S3.** Correlation value between chemical compounds of extracts and enzyme inhibitory abilities ( $R^2$ )

| Compounds                           | AChE  | Tyrosinase | Amylase | Glucosidase |
|-------------------------------------|-------|------------|---------|-------------|
| Quinic acid                         | 0,01  | -0,21      | -0,45   | 0,22        |
| Danshensu                           | 0,46  | 0,26       | -0,35   | 0,57        |
| Hydroxybenzoic acid-O-hexoside      | -0,48 | -0,5       | 0,05    | -0,09       |
| Hydroxybenzoic acid                 | -0,02 | 0,17       | 0,21    | -0,04       |
| Caftaric acid                       | 0,77  | 0,89       | -0,1    | 0,33        |
| Caffeic acid-O-hexoside             | -0,46 | -0,5       | 0,04    | -0,04       |
| Tuberonic acid-O-hexoside           | -0,1  | -0,35      | -0,27   | 0,35        |
| Roseoside                           | 0,8   | 0,91       | -0,12   | 0,33        |
| Caffeic acid                        | -0,35 | -0,05      | 0,38    | -0,4        |
| Thymoquinol-O-hexoside              | -0,09 | -0,23      | -0,15   | 0,32        |
| Tuberonic acid                      | -0,8  | -0,9       | 0,12    | -0,35       |
| Quercetin-C-deoxyhesoide-C-hexoside | -0,1  | -0,35      | -0,26   | 0,35        |
| Fertaric acid                       | 0,8   | 0,9        | -0,13   | 0,32        |
| Luteolin-C-deoxyhexoside-C-hexoside | -0,52 | -0,74      | -0,09   | -0,08       |
| Aromadendrin-O-hexoside             | -0,42 | -0,34      | 0,29    | -0,52       |
| p-Menth-1-ene-3,4-diol-O-hexoside   | -0,78 | -0,88      | 0,11    | -0,31       |
| Luteolin-di-O-glucuronide           | -0,1  | -0,35      | -0,27   | 0,35        |
| Quercetin-O-hexoside I              | -0,68 | -0,55      | 0,39    | -0,67       |
| Quercetin-O-pentoside-O-hexoside    | 0,38  | 0,58       | 0,03    | 0,31        |
| Taxifolin                           | -0,36 | -0,55      | -0,08   | 0,01        |
| Salvianolic acid H                  | 0,66  | 0,52       | -0,37   | 0,68        |
| Quercetin-O-hexoside II             | -0,35 | -0,05      | 0,39    | -0,41       |
| Galocatechin                        | -0,81 | -0,91      | 0,11    | -0,39       |
| Luteolin-O-deoxyhexoside-O-hexoside | 0,38  | 0,58       | 0,02    | 0,3         |
| Salvianolic acid D                  | 0,22  | 0,14       | -0,23   | 0,59        |
| Rosmarinic acid                     | -0,01 | -0,28      | -0,28   | 0,25        |
| Salvianolic acid B                  | -0,1  | -0,35      | -0,27   | 0,35        |
| Salvianolic acid A                  | -0,1  | -0,35      | -0,27   | 0,35        |
| Cichoric acid                       | 0,78  | 0,9        | -0,1    | 0,33        |
| Cymenol-O-hexoside                  | -0,69 | -0,55      | 0,38    | -0,69       |
| Salvianolic acid I                  | -0,1  | -0,35      | -0,27   | 0,35        |
| Eriodictyol                         | -0,68 | -0,54      | 0,41    | -0,66       |
| Salvianolic acid E                  | -0,1  | -0,35      | -0,27   | 0,35        |
| Salvianolic acid A isomer           | 0,79  | 0,91       | -0,09   | 0,34        |
| Luteolin                            | -0,38 | -0,1       | 0,43    | -0,43       |
| Trihydroxyoctadecadienoic acid I    | -0,45 | -0,31      | 0,28    | -0,64       |

|                                                               |       |       |       |       |
|---------------------------------------------------------------|-------|-------|-------|-------|
| Apigenin                                                      | -0,1  | -0,35 | -0,26 | 0,36  |
| Cirsimaritin                                                  | 0,05  | 0,31  | 0,36  | -0,35 |
| Trihydroxyoctadecenoic acid I                                 | -0,69 | -0,55 | 0,38  | -0,68 |
| Ladanein                                                      | 0,4   | 0,61  | 0,07  | 0,33  |
| Kaempferol                                                    | -0,1  | -0,35 | -0,25 | 0,36  |
| Carvone                                                       | -0,1  | -0,35 | -0,26 | 0,35  |
| Trihydroxyoctadecadienoic acid II                             | -0,68 | -0,55 | 0,39  | -0,67 |
| Pebrellin                                                     | -0,68 | -0,54 | 0,41  | -0,66 |
| Cirsilineol                                                   | 0,05  | 0,31  | 0,32  | -0,36 |
| Hydroperoxyoctadecadienoic acid                               | -0,41 | -0,15 | 0,65  | -0,33 |
| Carnosol                                                      | -0,63 | -0,72 | 0,38  | -0,3  |
| Dehydrocarnosol                                               | -0,78 | -0,89 | 0,17  | -0,33 |
| Hydroxyoctadecatrienoic acid                                  | 0,27  | 0,29  | 0,5   | 0,11  |
| 4'-Hydroxy-5,5'-diisopropyl-2,2'-dimethyl-3,4-biphenylquinone | -0,31 | -0,47 | 0,57  | 0,08  |
| Hydroxyoctadecadienoic acid                                   | 0,38  | 0,31  | 0,74  | 0,43  |
| 3,4,4'-Trihydroxy-5,5'-diisopropyl-2,2'-dimethylbiphenyl      | -0,35 | -0,45 | 0,7   | 0,04  |



**Table S4.** Correlation value between chemical compounds of essential oils and enzyme inhibitory abilities ( $R^2$ )

| Compounds                                | AChe  | BChE  | Tyrosinase | Amylase |
|------------------------------------------|-------|-------|------------|---------|
| Methyl 2-methylbutanoate                 | 0,73  | 0,97  | 0,73       | 0,76    |
| $\alpha$ -Phellandrene                   | 0,44  | 0,81  | 0,43       | 0,48    |
| $\alpha$ -Pinene                         | 0,68  | 0,95  | 0,68       | 0,72    |
| Camphene                                 | 0,67  | 0,94  | 0,67       | 0,7     |
| Sabinene                                 | 0,23  | -0,26 | 0,23       | 0,18    |
| $\beta$ -Pinene                          | 0,8   | 0,99  | 0,8        | 0,83    |
| 3-Octanone                               | -0,45 | 0,02  | -0,46      | -0,41   |
| $\beta$ -Myrcene*                        | 0,43  | 0,81  | 0,43       | 0,48    |
| 3-Octanol                                | 0,51  | 0,85  | 0,5        | 0,55    |
| 3-Thujene                                | 0,09  | 0,55  | 0,09       | 0,14    |
| 3-Carene                                 | 0,73  | 0,97  | 0,73       | 0,76    |
| $\alpha$ -Terpinene                      | 0,21  | 0,64  | 0,2        | 0,25    |
| <i>p</i> -Cymene                         | 0,54  | 0,87  | 0,53       | 0,58    |
| Limonene*                                | 0,64  | 0,93  | 0,63       | 0,67    |
| Eucalyptol                               | 0,39  | -0,09 | 0,39       | 0,34    |
| <i>trans</i> - $\beta$ -Ocimene          | 0,23  | -0,26 | 0,23       | 0,18    |
| <i>cis</i> - $\alpha$ -Ocimene           | 0,23  | -0,26 | 0,23       | 0,18    |
| $\gamma$ -Terpinene                      | 0,21  | 0,65  | 0,2        | 0,26    |
| 4-Pentenyl butyrate                      | 0,73  | 0,97  | 0,73       | 0,76    |
| <i>cis</i> - $\alpha$ -Terpineol         | 0,97  | 0,97  | 0,97       | 0,98    |
| $\alpha$ -Terpinolene                    | 0,77  | 0,37  | 0,77       | 0,74    |
| <i>p</i> -Cymenene                       | 0,73  | 0,97  | 0,73       | 0,76    |
| Linalool*                                | 0,37  | -0,11 | 0,37       | 0,32    |
| <i>trans</i> -5-Caranol                  | -0,96 | -0,71 | -0,96      | -0,94   |
| Fenchyl alcohol                          | 0,23  | -0,26 | 0,23       | 0,18    |
| <i>cis</i> - <i>p</i> -Menth-2-en-1-ol   | 0,4   | 0,78  | 0,39       | 0,44    |
| <i>trans</i> - <i>p</i> -Menth-2-en-1-ol | 0,4   | 0,78  | 0,39       | 0,44    |
| Camphor                                  | 0,87  | 0,54  | 0,87       | 0,85    |
| <i>cis</i> -Terpin hydrate               | 0,23  | -0,26 | 0,23       | 0,18    |
| Borneol                                  | 0,39  | 0,78  | 0,39       | 0,44    |
| Terpinen-4-ol                            | 0,26  | 0,69  | 0,26       | 0,31    |
| <i>p</i> -Cymen-8-ol                     | 0,62  | 0,92  | 0,61       | 0,65    |
| Estragole                                | 0,23  | -0,26 | 0,23       | 0,18    |
| <i>trans</i> - $\alpha$ -Terpineol       | 0,25  | 0,68  | 0,24       | 0,29    |
| Dihydrocarvone                           | -0,96 | -0,71 | -0,96      | -0,94   |
| Octyl acetate                            | 0,23  | -0,26 | 0,23       | 0,18    |
| <i>cis</i> -Geraniol                     | 0,23  | -0,26 | 0,23       | 0,18    |

|                                     |       |       |       |       |
|-------------------------------------|-------|-------|-------|-------|
| Thymol methyl ether                 | 0,73  | 0,97  | 0,73  | 0,76  |
| Isothymol methyl ether              | 0,22  | 0,65  | 0,21  | 0,26  |
| <i>d</i> -Darvone                   | -0,4  | -0,78 | -0,39 | -0,44 |
| <i>trans</i> -Geraniol              | 0,71  | 0,3   | 0,72  | 0,68  |
| <i>m</i> -Cymene                    | 0,73  | 0,97  | 0,73  | 0,76  |
| Thymol isomer                       | 0,65  | 0,93  | 0,64  | 0,68  |
| Bornyl acetate                      | 0,23  | -0,26 | 0,23  | 0,18  |
| Thymol                              | 0,56  | 0,88  | 0,55  | 0,6   |
| Carvacrol                           | -0,94 | -0,66 | -0,94 | -0,92 |
| ( <i>Z</i> )-Methyl cinnamate       | 0,23  | -0,26 | 0,23  | 0,18  |
| Isoeugenol                          | -0,96 | -0,71 | -0,96 | -0,94 |
| 2-Hydroxycineole<br>acetate         | 0,23  | -0,26 | 0,23  | 0,18  |
| Eugenol                             | 0,25  | -0,24 | 0,26  | 0,2   |
| Isobornyl propionate                | 0,73  | 0,97  | 0,73  | 0,76  |
| Copaene                             | 0,69  | 0,27  | 0,69  | 0,66  |
| $\alpha$ -Farnesene                 | 0,73  | 0,97  | 0,73  | 0,76  |
| ( <i>E</i> )-Methyl cinnamate       | 0,23  | -0,26 | 0,23  | 0,18  |
| $\beta$ -Elemene                    | 0,23  | -0,26 | 0,23  | 0,18  |
| Methyl eugenol                      | 0,23  | -0,26 | 0,23  | 0,18  |
| ( <i>E</i> )- $\alpha$ -Bergamotene | 0,23  | -0,26 | 0,23  | 0,18  |
| Caryophyllene*                      | 0,25  | 0,68  | 0,25  | 0,3   |
| ( <i>Z</i> )- $\alpha$ -Bergamotene | 0,23  | -0,26 | 0,24  | 0,18  |
| 4- <i>t</i> -Butyl-pyrocatechol     | 0,58  | 0,89  | 0,57  | 0,62  |
| $\gamma$ -Elemene                   | -0,68 | -0,94 | -0,67 | -0,71 |
| $\beta$ -Farnesene                  | 0,23  | -0,26 | 0,23  | 0,18  |
| Cedrene                             | 0,23  | -0,26 | 0,23  | 0,18  |
| Humulene*                           | 0,07  | -0,41 | 0,07  | 0,02  |
| Nerol acetate                       | 0,73  | 0,97  | 0,73  | 0,76  |
| $\beta$ -Cubenene                   | 0,23  | -0,26 | 0,23  | 0,18  |
| $\alpha$ -Himalachene               | 0,23  | -0,26 | 0,23  | 0,18  |
| $\alpha$ -Huaiene                   | 0,93  | 0,65  | 0,93  | 0,91  |
| Germacrene D                        | 0,23  | -0,26 | 0,23  | 0,18  |
| $\beta$ -Selinene                   | 0,42  | -0,06 | 0,42  | 0,37  |
| $\alpha$ -Selinene                  | 0,42  | -0,06 | 0,42  | 0,37  |
| $\beta$ -Bisabolene                 | -0,9  | -1    | -0,9  | -0,92 |
| $\gamma$ -Cadinene                  | 0,29  | -0,2  | 0,29  | 0,24  |
| $\beta$ -Cadinene                   | 0,42  | 0,8   | 0,42  | 0,47  |
| $\delta$ -Cadinene                  | 0,36  | -0,12 | 0,37  | 0,32  |
| $\alpha$ -Bisabolene                | 0,23  | -0,26 | 0,23  | 0,18  |
| ( <i>E</i> )-Farnesene epoxide      | 0,23  | -0,26 | 0,23  | 0,18  |

|                                                 |       |       |       |       |
|-------------------------------------------------|-------|-------|-------|-------|
| Nerolidol                                       | 0,23  | -0,26 | 0,23  | 0,18  |
| Globulol                                        | 0,23  | -0,26 | 0,23  | 0,18  |
| Spathulenol                                     | 0,19  | -0,3  | 0,19  | 0,14  |
| $\beta$ -Caryophyllene oxide*                   | -0,12 | 0,37  | -0,12 | -0,07 |
| Aromadendrene oxide                             | 0,23  | -0,26 | 0,23  | 0,18  |
| <i>cis</i> -(Z)- $\alpha$ -Bisabolene epoxide   | 0,23  | -0,26 | 0,23  | 0,18  |
| <i>trans</i> -(E)- $\alpha$ -Bisabolene epoxide | -0,96 | -0,71 | -0,96 | -0,94 |
| Cubenol                                         | 0,34  | -0,15 | 0,34  | 0,29  |
| $\gamma$ -Eudesmol                              | 0,73  | 0,97  | 0,73  | 0,76  |
| <i>trans</i> -(Z)- $\alpha$ -Bisabolene epoxide | 0,23  | -0,26 | 0,23  | 0,18  |
| $\alpha$ -Cadinol                               | 0,27  | -0,22 | 0,28  | 0,23  |
| $\beta$ -Eudesmol                               | 0,32  | -0,17 | 0,32  | 0,27  |
| <i>allo</i> -Aromadendrene epoxide              | 0,64  | 0,21  | 0,65  | 0,61  |
| $\alpha$ -Bisabolol*                            | 0,23  | -0,26 | 0,23  | 0,18  |
| Ledene alcohol                                  | 0,23  | -0,26 | 0,23  | 0,18  |
| Ledene oxide                                    | 0,23  | -0,26 | 0,23  | 0,18  |
| Isoaromandendrene epoxide                       | 0,23  | -0,26 | 0,23  | 0,18  |
